# Supplementary material
Source: PubMed Central journal article supplement (PMC4505634)
Supplement: JVI.00333-15_zjv999090599so1.pdf [file JVI.00333-15_zjv999090599so1.pdf]

1 **Table S1** P6.9 PTM-site-mapping data.

| Sample                            | Sequence of Identified Peptide | Site          | Activation Type |
|-----------------------------------|--------------------------------|---------------|-----------------|
| vPK1:FLAG-infected cells<br>No. 0 | RRRR <u>R</u> *SSTGTTY         | R7; R8        | ETD             |
|                                   | GSTRRRR*SSGY                   | R21; R22      | CID             |
|                                   | RRR <u>PGRPR</u> *TY           | R28; R32; R34 | CID             |
| No. 1                             | RRRrRSSTGTTY                   | R7            | ETD             |
|                                   | RRRRrSSTGTTY                   | R8            | ETD             |
|                                   | RRRRR <sub>s</sub> STGTTY      | S9            | ETD             |
|                                   | RRRRRSSTGtTY                   | T13           | ETD             |
|                                   | RRRRRSSTGTtY                   | T14           | ETD             |
|                                   | GSTRRRrSSGY                    | R22           | ETD             |
|                                   | GSTRRRR <sub>s</sub> SGY       | S23           | ETD             |
|                                   | GSTRRRRS <sub>s</sub> GY       | S24           | ETD             |
|                                   | RRSR <sub>r</sub> SSTGRRSY     | R42           | ETD             |
|                                   | RRSR <sub>s</sub> STGRRSY      | S43           | ETD             |
|                                   | RRSRRSSTGRrSY                  | R48           | ETD             |
|                                   | RRSRRSSTGRR <sub>s</sub> Y     | S49           | ETD             |
| No. 2                             | RRRRrSSTGTTY                   | R8            | ETD             |
|                                   | RRRrrSSTGTTY                   | R7; R8        | ETD             |
|                                   | RRRRR <sub>s</sub> STGTTY      | S9            | ETD             |
|                                   | RRRRRSstGTTY                   | S10; T11      | ETD             |
|                                   | RRRRR <sub>ss</sub> TGTTY      | S9; S10       | ETD             |
|                                   | RRRRRSStGTTY                   | T11           | ETD             |
|                                   | RRRRRSSTGtTY                   | T13           | ETD             |
|                                   | RRRRRSSTGTtY                   | T14           | ETD             |
|                                   | GSTRRrRSSGY                    | R21           | ETD             |
|                                   | GSTRRRrSSGY                    | R22           | ETD             |
|                                   | GSTRRRR <sub>s</sub> SGY       | S23           | ETD             |
|                                   | GSTRRRRS <sub>s</sub> GY       | S24           | ETD             |
|                                   | RRR <u>PGRPR</u> *TY           | R28; R32; R34 | CID             |
|                                   | RRSR <sub>r</sub> SSTGRRSY     | R42           | ETD             |
|                                   | RRSR <sub>s</sub> STGRRSY      | S43           | ETD             |
|                                   | RRSRRSStGRRSY                  | T45           | ETD             |
|                                   | RRSRRSSTGrRSY                  | R47           | ETD             |
|                                   | RRSRRSSTGRrSY                  | R48           | ETD             |
|                                   | RRSRRSSTGRR <sub>s</sub> Y     | S49           | ETD             |
|                                   | No. 3                          | RRrrRSSTGTTY  | R6; R7          |
| RRRrrSSTGTTY                      |                                | R7; R8        | ETD             |

|       |                                        |          |     |
|-------|----------------------------------------|----------|-----|
|       | RRRRrSSTGTTY                           | R8       | ETD |
|       | RRRRR <sub>ss</sub> TGTTY              | S9; S10  | ETD |
|       | RRRRR <sub>s</sub> STGTTY              | S9       | ETD |
|       | RRRRR <sub>st</sub> GTTY               | S10; T11 | ETD |
|       | RRRRRSS <sub>t</sub> GTTY              | T11      | ETD |
|       | RRRRRSS <sub>t</sub> G <sub>t</sub> TY | T13      | ETD |
|       | RRRRRSS <sub>t</sub> G <sub>t</sub> Y  | T14      | ETD |
|       | GSTRRrRSSGY                            | R21      | ETD |
|       | GSTRRRR*SSGY                           | R22      | CID |
|       | GSTRRRrSSGY                            | R22      | ETD |
|       | GSTRRRR <sub>s</sub> SGY               | S23      | ETD |
|       | GSTRRRRS <sub>s</sub> GY               | S24      | ETD |
|       | RRSR <sub>s</sub> RSSTGRRSY            | S41      | ETD |
|       | RRSR <sub>r</sub> SSTGRRSY             | R42      | ETD |
|       | RRSR <sub>s</sub> STGRRSY              | S43      | ETD |
|       | RRSR <sub>st</sub> GRRSY               | T45      | ETD |
|       | RRSR <sub>st</sub> G <sub>r</sub> RSY  | R47      | ETD |
|       | RRSR <sub>st</sub> G <sub>r</sub> SY   | R48      | ETD |
|       | RRSR <sub>st</sub> GRR <sub>s</sub> Y  | S49      | ETD |
| No. 4 | RRRr <sub>r</sub> SSTGTTY              | R7; R8   | ETD |
|       | RRRRrSSTGTTY                           | R8       | ETD |
|       | RRRRR <sub>s</sub> STGTTY              | S9       | ETD |
|       | RRRRR <sub>st</sub> GTTY               | S10; T11 | ETD |
|       | RRRRR <sub>ss</sub> TGTTY              | S9; S10  | ETD |
|       | RRRRRSS <sub>t</sub> GTTY              | T11      | ETD |
|       | RRRRRSS <sub>t</sub> G <sub>t</sub> TY | T13      | ETD |
|       | RRRRRSS <sub>t</sub> G <sub>t</sub> Y  | T14      | ETD |
|       | GSTRRRR*RSSGY                          | R21; R22 | CID |
|       | GSTRRRRSSGY                            | R22      | CID |
|       | GSTRRRrSSGY                            | R22      | ETD |
|       | GSTRRRR <sub>ss</sub> GY               | S23; S24 | ETD |
|       | GSTRRRRS <sub>s</sub> GY               | S24      | ETD |
|       | GSTRRRR <sub>s</sub> SGY               | S23      | ETD |
|       | RRSR <sub>r</sub> SSTGRRSY             | R42      | ETD |
|       | RRSR <sub>s</sub> STGRRSY              | S43      | ETD |
|       | RRSR <sub>st</sub> GRRSY               | R47      | ETD |
|       | RRSR <sub>st</sub> G <sub>r</sub> SY   | R48      | ETD |
|       | RRSR <sub>st</sub> GRR <sub>s</sub> Y  | S49      | ETD |
| No. 5 | RRRr <sub>r</sub> SSTGTTY              | R7; R8   | ETD |
|       | RRRRrSSTGTTY                           | R8       | ETD |
|       | RRRRR <sub>s</sub> STGTTY              | S9       | ETD |

No. 6

|                                          |          |     |
|------------------------------------------|----------|-----|
| RRRRR <sub>ss</sub> TGTTY                | S9; S10  | ETD |
| RRRRR <sub>st</sub> GTTY                 | S10; T11 | ETD |
| RRRRR <sub>SS</sub> tGTTY                | T11      | ETD |
| RRRRR <sub>SS</sub> TG <sub>t</sub> TY   | T13      | ETD |
| RRRRR <sub>SS</sub> TG <sub>tt</sub> Y   | T13; T14 | ETD |
| RRRRR <sub>SS</sub> TG <sub>T</sub> tY   | T14      | ETD |
| GSTRRR <sub>r</sub> SSGY                 | R22      | ETD |
| GSTRRR <sub>rr</sub> SSGY                | R21; R22 | ETD |
| GSTRRRR <sub>ss</sub> GY                 | S23; S24 | ETD |
| GSTRRRR <sub>s</sub> SGY                 | S23      | ETD |
| RRR <u>PGR</u> * <u>PR</u> *TY           | R32; R34 | ETD |
| RRSR <sub>s</sub> RSSTGRRSY              | S41      | ETD |
| RRSR <sub>r</sub> SSTGRRSY               | R42      | ETD |
| RRSR <sub>S</sub> sSTGRRSY               | S43      | ETD |
| RRR <sub>rr</sub> SSTGTTY                | R7; R8   | ETD |
| RRRR <sub>r</sub> SSTGTTY                | R8       | ETD |
| RRRRR <sub>ss</sub> TGTTY                | S9; S10  | ETD |
| RRRRR <sub>st</sub> GTTY                 | S10; T11 | ETD |
| RRRRR <sub>s</sub> STGTTY                | S9       | ETD |
| RRRRR <sub>SS</sub> tGTTY                | T11      | ETD |
| RRRRR <sub>SS</sub> TG <sub>t</sub> TY   | T13      | ETD |
| RRRRR <sub>SS</sub> TG <sub>tt</sub> Y   | T14      | ETD |
| RRRRR <sub>SS</sub> TG <sub>tt</sub> Y   | T13; T14 | ETD |
| GSTR <u>*R</u> *RRSSGY                   | R19; R20 | CID |
| GSTRRR <sub>r</sub> SSGY                 | R22      | ETD |
| GSTRRR <sub>rr</sub> SSGY                | R21; R22 | ETD |
| GSTRRRR <sub>ss</sub> GY                 | S23; S24 | ETD |
| GSTRRRR <sub>s</sub> SGY                 | S23      | ETD |
| RRSR <sub>r</sub> SSTGRRSY               | R42      | ETD |
| RRSR <sub>S</sub> sSTGRRSY               | S43      | ETD |
| RRSR <sub>S</sub> RSSTGR <sub>r</sub> SY | R48      | ETD |
| RR <sub>rr</sub> RSSTGTTY                | R6; R7   | ETD |
| RRRR <sub>r</sub> SSTGTTY                | R7       | ETD |
| RRR <sub>rr</sub> SSTGTTY                | R7; R8   | ETD |
| RRRR <sub>r</sub> SSTGTTY                | R8       | ETD |
| RRRRR <sub>ss</sub> TGTTY                | S9; S10  | CID |
| RRRRR <sub>st</sub> GTTY                 | S10; T11 | ETD |
| RRRRR <sub>s</sub> TG <sub>t</sub> TY    | S10; T13 | ETD |
| RRRRR <sub>SS</sub> TG <sub>tt</sub> Y   | T13; T14 | ETD |
| RRRRR <sub>SS</sub> TG <sub>t</sub> TY   | T13      | ETD |
| RRRRR <sub>SS</sub> TG <sub>T</sub> tY   | T14      | ETD |

No. 7

|                                                 |                                                                           |               |     |
|-------------------------------------------------|---------------------------------------------------------------------------|---------------|-----|
|                                                 | GSTrRRrSSGY                                                               | R19; R22      | ETD |
|                                                 | GSTRRrSSGY                                                                | R21; R22      | ETD |
|                                                 | GSTRRRrSSGY                                                               | R22           | ETD |
|                                                 | GsTRRRR <sub>s</sub> SGY                                                  | S17; S23      | ETD |
|                                                 | GSTRRRR <sub>s</sub> SGY                                                  | S23           | ETD |
|                                                 | GStRRRR <sub>s</sub> GY                                                   | T18; S24      | ETD |
|                                                 | GSTRRRR <sub>ss</sub> GY                                                  | S23; S24      | ETD |
|                                                 | RRRR <sub>sst</sub> GTTY                                                  | S9; S10; T11  | ETD |
|                                                 | RRRR <sub>ss</sub> TGtTY <sup>a</sup>                                     |               | ETD |
| <b>BV</b>                                       | GSTR <u>R</u> *R*RRSSGY                                                   | R19; R20      | ETD |
|                                                 | <u>RR</u> *SRSRSSTGRRSY                                                   | R38           | ETD |
| <b>vPK1KO<br/>bacmid-<br/>transfected cells</b> |                                                                           |               |     |
| No. 0                                           | <u>R</u> *R <sub>S</sub> R <sub>S</sub> R <sub>S</sub> SSTGR <u>R</u> *SY | R37; R47; R48 | ETD |
| No. 1                                           | RRRrRSSTGTTY                                                              | R7            | ETD |
|                                                 | RRRRrSSTGTTY                                                              | R8            | ETD |
|                                                 | RRRRR <sub>s</sub> STGTTY                                                 | S9            | ETD |
|                                                 | RRRRRSSTGtTY                                                              | T13           | ETD |
|                                                 | RRRRRSSTGTtY                                                              | T14           | ETD |
|                                                 | GSTRRrRSSGY                                                               | R21           | ETD |
|                                                 | GSTRRRrSSGY                                                               | R22           | ETD |
|                                                 | GSTRRRR <sub>s</sub> SGY                                                  | S23           | ETD |
|                                                 | GSTRRRR <sub>s</sub> SGY                                                  | S24           | ETD |
| No. 2                                           | RRRrRSSTGTTY                                                              | R7            | ETD |
|                                                 | RRRRrSSTGTTY                                                              | R8            | ETD |
|                                                 | RRRRRSStGTTY                                                              | T11           | ETD |
|                                                 | RRRRRSSTGtTY                                                              | T13           | ETD |
|                                                 | RRRRRSSTGTtY                                                              | T14           | ETD |
|                                                 | GSTRRR <u>R</u> *SSGY                                                     | R22           | CID |
|                                                 | GSTRRrRSSGY                                                               | R21           | ETD |
|                                                 | GSTRRRrSSGY                                                               | R22           | ETD |
|                                                 | GSTRRRR <sub>s</sub> SGY                                                  | S23           | ETD |
| No. 3                                           | RRRRrSSTGTTY                                                              | R8            | ETD |
|                                                 | RRRRRSStGTTY                                                              | T11           | ETD |
|                                                 | RRRRRSSTGtTY                                                              | T13           | ETD |
|                                                 | RRRRRSSTGTtY                                                              | T14           | ETD |
|                                                 | GSTRRR <u>R</u> *SSGY                                                     | R22           | ETD |
|                                                 | GSTRRRrSSGY                                                               | R22           | CID |

---

|       |                              |          |     |
|-------|------------------------------|----------|-----|
| No. 4 | GSTRRRR <sub>s</sub> SGY     | S23      | ETD |
|       | GSTRRRRS <sub>s</sub> GY     | S24      | ETD |
|       | RRRrRSSTGTTY                 | R7       | ETD |
|       | RRRRrSSTGTTY                 | R8       | ETD |
|       | RRRRRSStGTTY                 | T11      | ETD |
|       | RRRRRSSTGtTY                 | T13      | ETD |
|       | RRRRRSSTGTtY                 | T14      | ETD |
|       | GSTRRR <u><u>R</u></u> *SSGY | R21; R22 | CID |
|       | GSTRRRrRSSGY                 | R21      | ETD |
|       | GSTRRRrSSGY                  | R22      | ETD |
|       | GSTRRRR <sub>s</sub> SGY     | S23      | ETD |

---

2 The phosphorylated residues are indicated by lowercase letters. The methylated residues are  
3 underlined, and an asterisk is added if a residue is dimethylated.

4 <sup>a</sup> The peptide is triply phosphorylated; however, an unambiguous assignment of the  
5 phosphorylation sites was not possible on the basis of the MS/MS data.
